# Supplementary material
Source: PubMed Central journal article supplement (PMC5995644)
Supplement: NIHMS958510-supplement-supplement_1.pdf [file NIHMS958510-supplement-supplement_1.pdf]

Supplemental Table 1. Genetic test methods as reported in the medical records of preterm and term males with Duchenne muscular dystrophy and no family history of dystrophinopathy at birth, MD STARnet

| <b>Genetic test</b>         | <b>N</b> | <b>%</b> |
|-----------------------------|----------|----------|
| Multiplex PCR/Southern Blot | 102      | 31.38    |
| PCR                         | 68       | 20.92    |
| MLPA                        | 16       | 4.92     |
| CGH array                   | 12       | 3.69     |
| SCAIP                       | 12       | 3.60     |
| DHPLC                       | 1        | 0.31     |
| Others                      | 4        | 1.23     |
| Unknown                     | 75       | 23.08    |
| Missing information         | 35       | 10.77    |

PCR = Polymerase Chain Reaction; MLPA = Multiplex Ligation-dependent Probe Amplification; CGH = Comparative Genomic Hybridization; SCAIP = Single Condition Amplification/ Internal Primer; DHPLC = Denaturing High-performance Liquid Chromatography, MD STARnet = Muscular Dystrophy Surveillance Tracking and Research Network

Supplemental Table 2. Mutation types as reported in the medical records of preterm and term males with Duchenne muscular dystrophy and no family history of dystrophinopathy at birth, MD STARnet

| <b>Mutation type</b> | <b>Definite DMD diagnosis (N=313)</b> |          | <b>Probable DMD diagnosis (N=12)</b> |          | <b>Preterm (N=30)</b> |          | <b>Term (N=295)</b> |          |
|----------------------|---------------------------------------|----------|--------------------------------------|----------|-----------------------|----------|---------------------|----------|
|                      | <b>n</b>                              | <b>%</b> | <b>n</b>                             | <b>%</b> | <b>n</b>              | <b>%</b> | <b>n</b>            | <b>%</b> |
| Deletion             | 195                                   | 62.30    | 1                                    | 8.33     | 17                    | 56.67    | 179                 | 60.68    |
| Duplication          | 33                                    | 10.54    | 1                                    | 8.33     | 2                     | 6.67     | 32                  | 10.85    |
| Point mutation       | 58                                    | 18.53    | 0                                    | 0        | 5                     | 16.67    | 53                  | 17.97    |
| Unknown              | 27                                    | 8.63     | 10                                   | 83.33    | 6                     | 20.00    | 31                  | 10.51    |

DMD = Duchenne muscular dystrophy, MD STARnet = Muscular Dystrophy Surveillance Tracking and Research Network

Supplemental Table 3. Sociodemographic characteristics of preterm and term males with Duchenne muscular dystrophy and no family history of dystrophinopathy at birth, MD STARnet

| <b>Sociodemographic Characteristics</b> | <b>Study cohort (N=325)</b> |          | <b>All potential cases (N=467)</b> |          | <b>P value*</b> |       |
|-----------------------------------------|-----------------------------|----------|------------------------------------|----------|-----------------|-------|
| <b>Race/ethnicity</b>                   | <b>n</b>                    | <b>%</b> | <b>n</b>                           | <b>%</b> |                 |       |
| White non-Hispanic                      | 214                         | 65.85    | 281                                | 60.17    | 0.20            |       |
| Black non-Hispanic                      | 27                          | 8.31     | 34                                 | 7.28     |                 |       |
| Hispanic or Latino                      | 52                          | 16.00    | 87                                 | 18.63    |                 |       |
| Other                                   | 32                          | 9.85     | 65                                 | 13.92    |                 |       |
| <b>State</b>                            |                             |          |                                    |          | 0.62            |       |
|                                         | AZ                          | 70       | 21.54                              | 60       |                 | 23.55 |
|                                         | CO                          | 63       | 19.38                              | 59       |                 | 21.84 |
|                                         | GA                          | 94       | 28.92                              | 85       |                 | 28.05 |
|                                         | IA                          | 47       | 14.46                              | 46       |                 | 14.35 |
|                                         | wNYS                        | 51       | 15.69                              | 45       |                 | 21.21 |

\*Chi-square test; MD STARnet = Muscular Dystrophy Surveillance Tracking and Research Network; AZ = Arizona; CO = Colorado; GA = Georgia; IA = Iowa; wNYS = western New York State
